# Supplementary material for: Thiol-functionalized TiO2 microspheres and Fe(0) nanoparticle-loaded polymeric hydrogel for the selective recovery of Cr(iii) and Cr(vi) from the aquatic medium
Source: Royal Society of Chemistry journal article supplement (doi:10.1039/d3en00377a), 2023-01-01
Supplement: d3en00377a1.pdf [file d3en00377a1.pdf]

## Supplementary material

### Thiol functionalized TiO<sub>2</sub> microspheres and Fe(0) nanoparticles loaded polymeric hydrogel for selective recovery of Cr(III) and Cr(VI) from aquatic medium

Reshmi Thekke Parayil<sup>a</sup>, Shweta Singh<sup>b</sup>, Ranita Basu<sup>a,c</sup>, Brindaban Modak<sup>a,d</sup>, Mehzabin Vivek Pimple<sup>b</sup>, Hirakendu Basu<sup>a,b,\*</sup>

<sup>a</sup> Homi Bhabha National Institute, Anushaktinagar, Mumbai-400094, India

<sup>b</sup> Analytical Chemistry Division, Bhabha Atomic Research Centre, Trombay, Mumbai-400085, India

<sup>c</sup> Technical Physics Division, Bhabha Atomic Research Centre, Trombay, Mumbai-400085, India

<sup>d</sup> Chemistry Division, Bhabha Atomic Research Centre, Trombay, Mumbai-400085, India

\*Corresponding Author: E mail: [hirak@barc.gov.in](mailto:hirak@barc.gov.in) ;Tel:91-22-25590312

#### Uptake capacity calculation:

The uptake capacity was calculated by using the equation (S1)

$$Q_e = (C_i - C_f) v / m \quad (S1)$$

Where  $Q_e$  uptake capacity in  $\mu\text{g g}^{-1}$ ,  $C_i$  and  $C_f$  are the initial and final concentration in  $\mu\text{g mL}^{-1}$ ,  $v$  is the volume of the metal ion solution in mL and  $m$  is the mass of the sorbent in g.

analysis  
TiO<sub>2</sub>-  
MS-Ca-

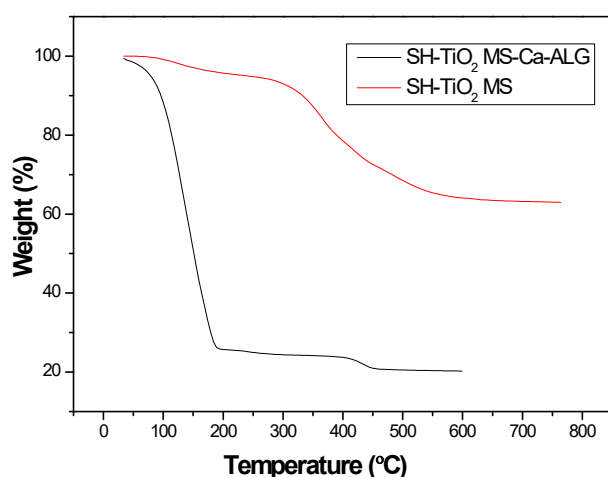

Thermo-  
gravimetric  
(TG) of the SH-  
MS and SH-TiO<sub>2</sub>-  
Alg beads:

Fig. S1: TG of SH-TiO<sub>2</sub> MS and SH-TiO<sub>2</sub>-MS-Ca-Alg beads

### Isotherm study:

Langmuir and Freundlich isotherms are two most widely used isotherm models for studying the interaction between sorbing medium and the sorbate. In Langmuir isotherm, it is assumed that there is only monolayer coverage on the surface of adsorbent whereas Freundlich model takes into consideration multilayer adsorption. Mathematically, Langmuir isotherm model is expressed as:

$$Q_e = Q_0 b C_e / (1 + b C_e) \quad (S2)$$

where  $Q_e$  is the equilibrium concentration of adsorbate ion in sorbent and  $C_e$  is equilibrium concentration of Cr(III)/Cr(VI) in solution.  $Q_0$  is the maximum adsorption capacity,  $b$  is the Langmuir binding constant. The Langmuir isotherm assumes that the free energy of adsorption does not depend on the surface coverage.

Freundlich model is expressed as:

$$Q_e = k C_e^{1/n} \quad (S3)$$

Freundlich isotherm model assumes that the ratio of the amount of solute adsorbed onto a given mass of adsorbent to the concentration of the solute in the solutions is not constant at different solution concentrations. The constants of  $k$  and  $n$  in the Freundlich model are related to the strength of the adsorptive bond and the bond distribution.

The isotherm plots are given below:

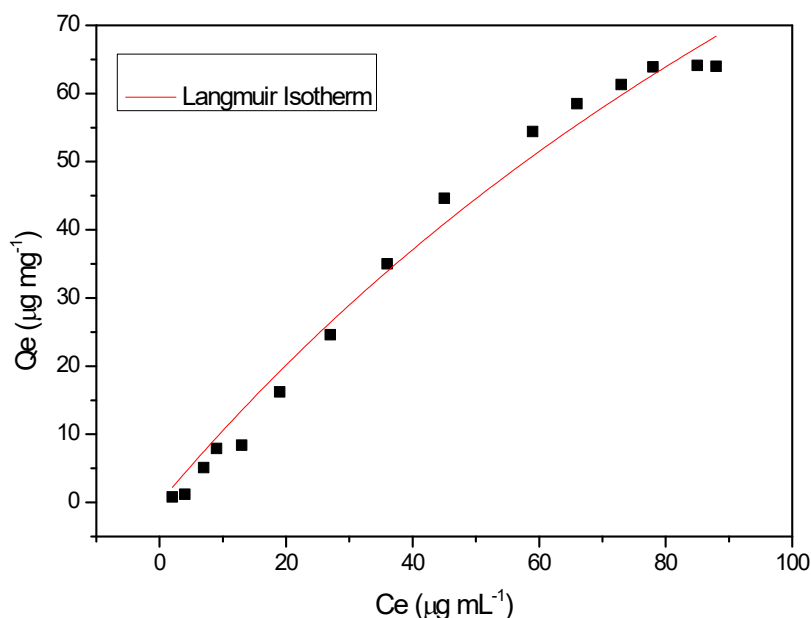

Fig. S2: Langmuir isotherm fitting for Cr(III) uptake by SH-TiO<sub>2</sub>-MS-Ca-Alg beads

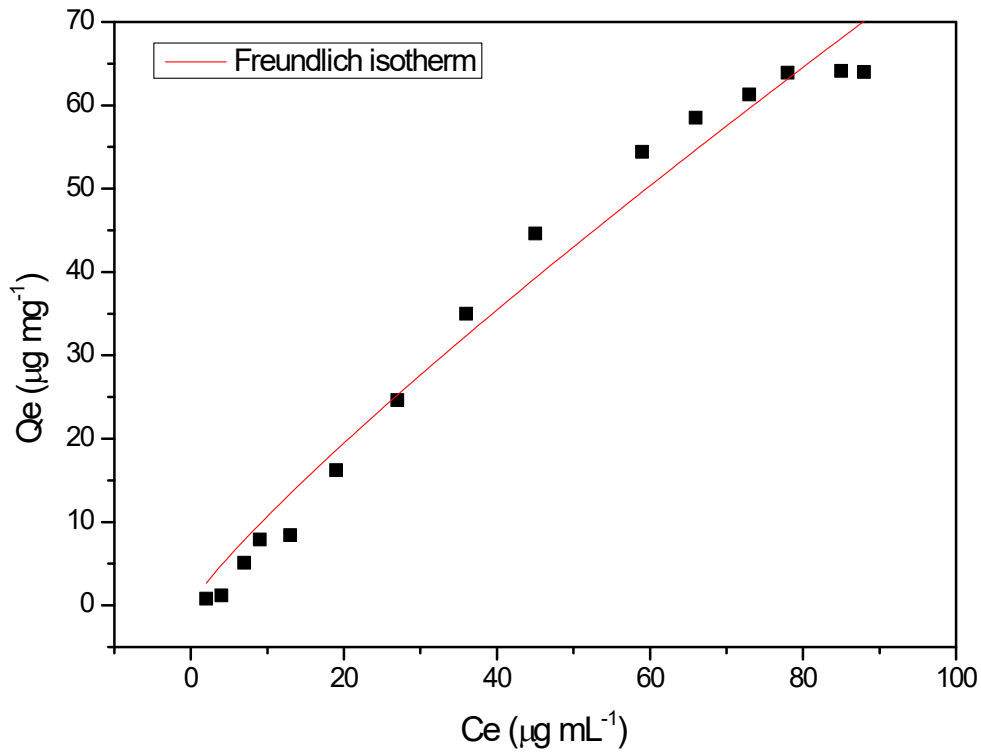

Fig. S3: Freundlich isotherm fitting for Cr(III) uptake by SH-TiO<sub>2</sub>-MS-Ca-Alg beads

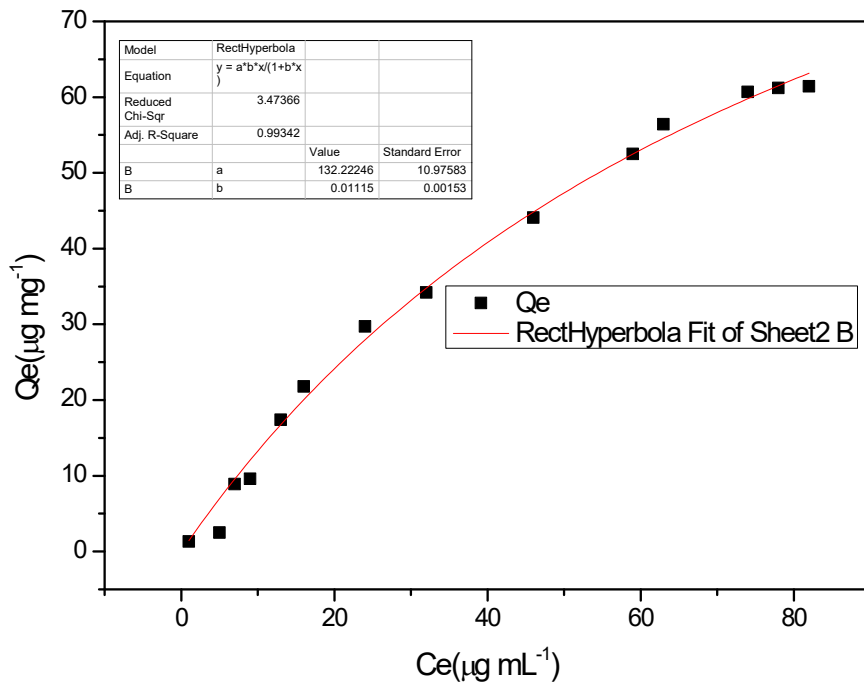

Fig. S4: Langmuir isotherm fitting for Cr(VI) uptake by Fe(0)-SH-TiO<sub>2</sub>-MS-Ca-Alg beads

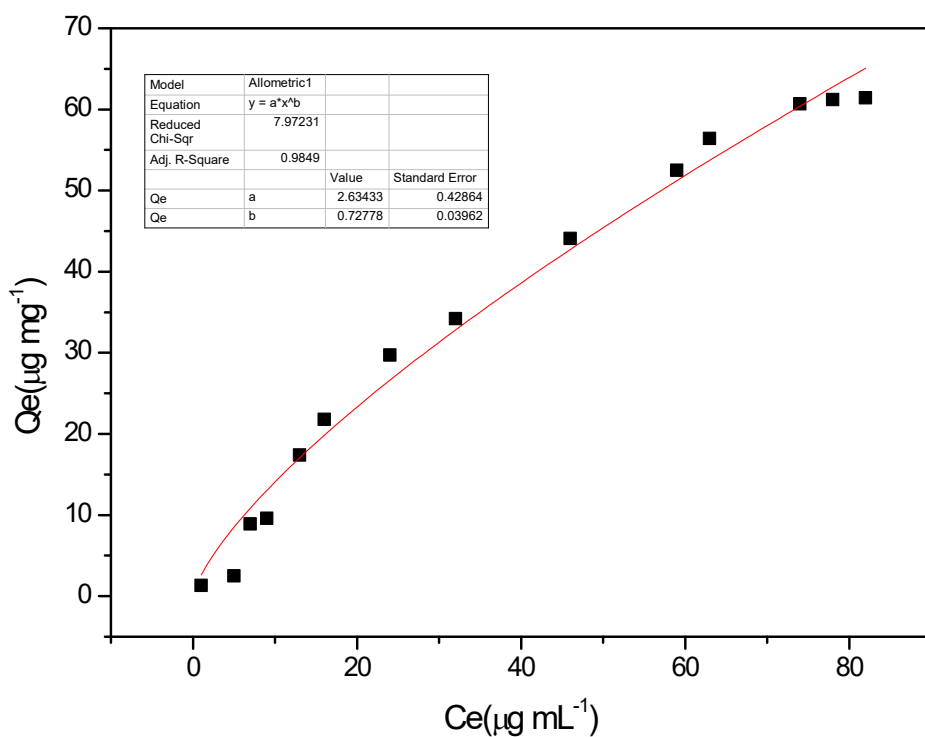

Fig. S5: Freundlich isotherm fitting for Cr(VI) uptake by Fe(0)-SH-TiO<sub>2</sub>-MS-Ca-Alg beads

**Kinetics study:**

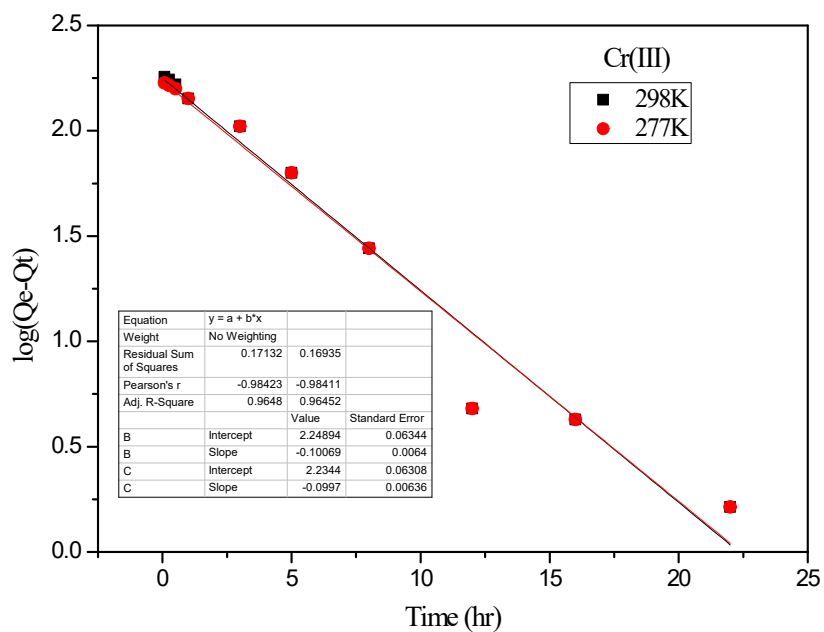

Fig. S6: Pseudo 1<sup>st</sup> order kinetic fitting for Cr(III) uptake by SH-TiO<sub>2</sub>-MS-Ca-Alg beads

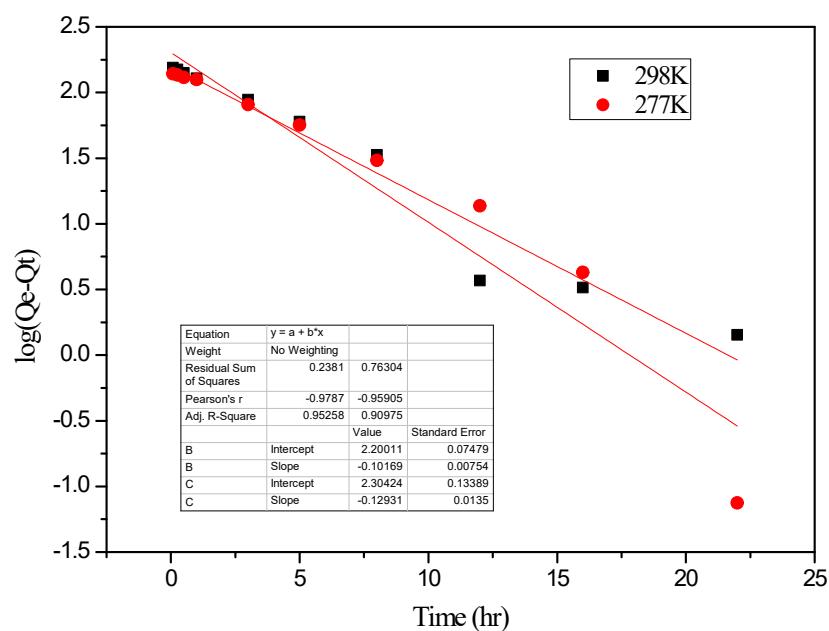

Fig. S7: Pseudo 1<sup>st</sup> order kinetic fitting for Cr(VI) uptake by Fe(0)-SH-TiO<sub>2</sub>-MS-Ca-Alg beads

### Table S1: Uptake study using regenerated beads

For reusability, used beads were taken and eluted using 1:1 mixture of 15 % thiourea and 4 N HNO<sub>3</sub>. The regenerated beads were washed with demineralized water and utilized for 5 consecutive cycles with about 20% overall reduction in the Cr(III) and Cr(VI) recovery. Conditions maintained were 0.1 µg mL<sup>-1</sup> concentration; 24h equilibration time; pH 2-3; number of beads 20. Removal efficiency (%) of Cr(III) and Cr(VI) using regenerated SH-TiO<sub>2</sub>MS-Ca-Alg and Fe(0)-SH-TiO<sub>2</sub>-MS-Ca-Alg beads are shown here (Table S1).

| Number of cycle | % uptake of Cr (III) using SH-TiO <sub>2</sub> -MS-Ca-Alg beads | % uptake of Cr (VI) using Fe(0)-SH-TiO <sub>2</sub> -MS-Ca-Alg beads |
|-----------------|-----------------------------------------------------------------|----------------------------------------------------------------------|
| 1               | 92.8                                                            | 91.2                                                                 |
| 2               | 89.3                                                            | 88.6                                                                 |
| 3               | 82.5                                                            | 80.1                                                                 |
| 4               | 78.3                                                            | 77.4                                                                 |
| 5               | 75.7                                                            | 74.2                                                                 |
